# Supplementary material for: Dynamic changes of Bacterial Microbiomes in Oropharynx during Infection and Recovery of COVID-19 Omicron Variant
Source: PLoS Pathog. 2024 Apr 3;20(4):e1012075. doi: 10.1371/journal.ppat.1012075 (PMC10990182; doi:10.1371/journal.ppat.1012075)
Supplement: S1 Table — (XLSX) [file ppat.1012075.s008.xlsx]

## Sheet: Sheet1
S1 Table. Detailed clinical data. Including confirmed cases of COVID-19 Omicron variant (CCO=297)
Y=Yes N=None U=Unknown	Cohort	nucleic testing	ICU or not	sex(1,male;2,female)	age(year)	nationality	Family gathering	Smoking history	Admission diagnosis classification（Mild and Moderate）	N gene CT value	ORF gene CT value	Accompanying disease	AIDS	TB	COPD	Kidney disease	Symptoms and signs	Fever	Maximum body temperature(℃)	Cough	Runny nose	Nasal congestion	Decreased sense of smell and taste	Muscle pain	Fatigue	Cough up phlegm	Hemoptysis	Headache	Diarrhoea	dyspnea	Systolic pressure(mmHg)	Diastolic pressure(mmHg)	Pulse( Times/min)	respiratory rate(Times/min)	Blood oxygen saturation(%)	laboratory testing results	White blood cell（10^9/L）	Neutro phil （10^9/L）	Lymp hocyte （10^9/L）	Eosinophil（10^9/L）	Hemoglobin(g/L)	Platelet （10^9/L）	ALT (U/L)	AST (U/L)	Albumin (g/L)	Total bilirubin (mmol/L)	UREA (mmol/L)	Creatinine(μmol/L)	Prothrombin time(s)
CCO01	Discovery	positive	N	1	46	Han	N	U	Mild	30.6	0		N	N	N	N		N	U	N	N	N	N	N	N	N	N	N	N	N	125	70	70	20	99		6.84	2.64	3.56	0.04	160	304	40	25	44.1	21.1	4.8	100	11.2
CCO02	Discovery	positive	N	2	56	Han	N	U	Mild	33.57	0		N	N	N	N		N	U	Y	N	N	N	N	N	N	N	N	N	N	125	80	80	19	99		6.23	3.59	1.89	0.15	145	232	7	130	37.4	5.4	4.2	74	11.9
CCO03	Discovery	positive	N	2	57	Han	N	U	Mild	30.79	0		N	N	N	N		N	U	N	Y	N	N	N	N	N	N	N	N	N	142	76	76	19	99		3.83	2.33	0.99	0.01	118	195	17	21	39.5	15	3.6	63	11.9
CCO04	Discovery	positive	N	1	17	Han	N	U	Mild	36.04	0		N	N	N	N		Y	39.2	N	N	N	N	N	N	Y	N	N	N	N	120	80	84	19	99		5.12	2.57	2.15	0.14	168	194	10	18	42.1	12.8	5.9	105	11.7
CCO05	Discovery	positive	N	1	19	Han	N	U	Mild	34	0		N	N	N	N		N	U	N	N	N	N	N	N	N	N	N	N	N	120	80	74	18	99		8.78	5.78	1.83	0.21	166	288	22	15	49.9	11	6.5	82	11.6
CCO06	Discovery	positive	N	1	19	Han	N	U	Mild	34.71	0		N	N	N	N		N	U	N	N	N	N	N	N	N	N	Y	N	N	116	78	80	20	99		4.82	2.07	2.21	0.2	162	212	13	12	44.1	26.1	6.4	69	11.2
CCO07	Discovery	positive	N	2	18	Han	N	U	Mild	32.75	0		N	N	N	N		Y	37.5	N	N	N	N	N	N	Y	N	N	N	N	116	78	72	19	99		4.57	2.42	1.71	0.04	133	321	9	13	49.4	19.5	4.9	81	11.3
CCO08	Discovery	positive	N	2	18	Han	N	U	Mild	32.27	0		N	N	N	N		Y	38.6	Y	N	N	N	N	N	Y	N	N	N	N	116	78	70	19	99		5.15	2.65	1.72	0.19	136	117	14	26	42.1	7.2	4.2	56	10.6
CCO09	Discovery	positive	N	2	18	Han	N	U	Mild	32.47	0		N	N	N	N		Y	38	Y	N	N	N	N	N	N	N	N	N	N	116	78	70	19	99		4.41	2.54	1.65	0.02	141	181	10	16	42.2	5.7	4.1	62	10.8
CCO10	Discovery	positive	N	2	17	Han	N	U	Mild	36.1	0		N	N	N	N		N	U	Y	Y	Y	N	N	N	N	N	N	N	N	116	78	78	19	99		6.88	4.75	1.45	0.17	137	219	11	13	48.8	7.6	3.3	76	10.6
CCO11	Discovery	positive	N	2	18	Han	N	U	Mild	35.14	0		N	N	N	N		N	U	Y	N	N	N	N	N	Y	N	N	N	N	102	68	80	20	99		4.69	1.54	2.57	0.14	132	195	12	15	41.3	12.2	4.5	64	11.1
CCO12	Discovery	positive	N	2	18	Han	N	U	Mild	28.73	0		N	N	N	N		Y	37.5	Y	N	N	N	N	N	N	N	N	N	N	105	74	96	19	99		5.6	3.38	1.81	0.05	130	234	46	32	40	15.9	5.1	64	14.4
CCO13	Discovery	positive	N	2	18	Han	N	U	Mild	35.66	0		N	N	N	N		Y	38	Y	N	N	N	N	N	N	N	N	N	N	128	85	98	18	99		5.22	2.51	1.85	0.26	105	292	9	13	46	8.2	5.3	69	11.7
CCO14	Discovery	positive	N	2	19	Han	N	U	Mild	36.88	0		N	N	N	N		Y	38.5	Y	N	N	N	N	N	N	N	N	N	N	139	95	84	18	99		5.59	3.16	2.12	0.06	150	147	9	17	45.5	12.2	4.6	67	12.1
CCO15	Discovery	positive	N	2	17	Han	N	U	Mild	26.09	35.93		N	N	N	N		N	U	N	N	Y	N	N	N	N	N	N	N	N	141	96	82	19	99		4.49	2.36	1.71	0.05	137	188	28	21	50.9	18.9	5.9	67	12.5
CCO16	Discovery	positive	N	2	18	Han	N	U	Mild	33.88	0		N	N	N	N		Y	38.5	N	N	N	N	N	N	N	N	N	N	N	124	94	108	19	99		3.25	1.59	1.16	0.16	124	176	7	15	42.1	9.2	5	67	11
CCO17	Discovery	positive	N	1	18	Han	N	U	Mild	33.74	0		N	N	N	N		N	U	N	N	N	N	N	N	N	N	N	N	N	129	91	88	19	99		4.77	2.37	2.03	0.06	169	224	34	24	46.9	13.5	6	81	11.7
CCO18	Discovery	positive	N	1	17	Han	N	U	Mild	33.5	0		N	N	N	N		N	U	Y	Y	Y	N	N	N	N	N	N	N	N	111	82	80	19	99		8.35	5.57	2.3	0.08	149	330	26	18	47.1	19.7	4.6	65	12.6
CCO19	Discovery	positive	N	1	18	Han	N	U	Mild	36.83	0		N	N	N	N		Y	37.5	Y	N	N	N	N	N	N	N	N	N	N	116	68	96	19	99		4.24	2.44	1.37	0.07	174	159	15	16	46.6	15	4.4	79	11.9
CCO20	Discovery	positive	N	1	18	Han	N	U	Mild	31.99	0		N	N	N	N		N	U	Y	N	N	N	N	N	Y	N	N	N	N	110	70	72	18	99		4.32	1.59	2.3	0.04	166	161	18	26	42.1	14.4	4.4	70	11.9
CCO21	Discovery	positive	N	2	40	Han	N	U	Mild	32.59	0		N	N	N	N		N	U	N	N	N	N	N	N	N	N	N	N	N	125	70	80	20	99		5.49	4.04	1.07	0.06	136	282	12	13	44.7	23.7	3.8	61	11.5
CCO22	Discovery	positive	N	2	19	Han	N	U	Mild	29.68	0		N	N	N	N		N	U	Y	N	Y	N	N	N	N	N	N	Y	N	120	76	70	19	99		4.23	2.28	1.64	0.08	124	217	14	16	43.5	10.8	4.3	63	12.1
CCO23	Discovery	positive	N	2	24	Han	N	U	Mild	35.68	0		N	N	N	N		Y	38.5	Y	N	N	N	N	N	N	N	N	N	N	116	76	76	18	99		2.77	1.45	0.98	0.04	126	245	8	13	42.2	8.5	3.8	73	10.9
CCO24	Discovery	positive	N	2	24	Han	N	U	Mild	25.03	0		N	N	N	N		Y	37.6	Y	N	N	N	N	N	N	N	N	N	N	120	80	76	21	99		3.13	1.74	0.96	0.05	69	236	35	28	48.5	11	4	55	11.8
CCO25	Discovery	positive	N	1	17	Han	N	U	Mild	31.69	0		N	N	N	N		Y	37.6	N	N	N	N	N	N	N	N	Y	Y	N	110	70	84	21	99		5.61	2.58	2.49	0.1	170	251	33	21	49.3	30.7	5	76	13.4
CCO26	Discovery	positive	N	2	18	Han	N	U	Mild	34.25	0		N	N	N	N		N	U	Y	N	N	N	N	N	N	N	N	N	N	122	96	72	18	99		7.68	4.65	2.33	0.13	163	222	19	16	44.5	8.2	6.2	70	11.1
CCO27	Discovery	positive	N	2	18	Han	N	U	Mild	27.06	34.18		N	N	N	N		N	U	Y	N	N	N	N	N	N	N	N	N	N	105	75	85	19	99		3.91	1.84	1.49	0.18	128	221	21	20	41.7	7.1	4.8	71	10.7
CCO28	Discovery	positive	N	2	18	Han	N	U	Mild	32.25	0		N	N	N	N		N	U	Y	N	N	N	N	N	N	N	N	N	N	117	87	83	21	99		6.47	4.16	1.8	0.08	129	108	18	15	40.3	9.8	6.3	51	11.9
CCO29	Discovery	positive	N	1	18	Han	N	U	Mild	34.45	0		N	N	N	N		N	U	Y	Y	N	N	N	N	N	N	N	N	N	106	68	73	18	99		8.29	5.07	2.31	0.25	167	172	21	19	44.4	11.9	5.5	71	11.3
CCO30	Discovery	positive	N	1	17	Han	N	U	Mild	30.84	28.67		N	N	N	N		N	U	Y	N	N	N	N	N	N	N	N	N	N	141	96	82	19	99		4.56	2.62	1.42	0.07	160	179	26	22	44.1	11.9	4.3	81	11.4
CCO31	Discovery	positive	N	1	17	Han	N	U	Mild	32.31	0		N	N	N	N		N	U	N	N	N	N	N	N	N	N	N	N	N	141	96	82	19	99		4.56	1.42	2.62	0.12	157	211	25	24	46.3	12.1	5.1	66	12.7
CCO32	Discovery	positive	N	1	17	Han	N	U	Mild	32.89	0		N	N	N	N		N	U	N	N	N	N	N	N	N	N	N	N	N	127	67	63	19	99		4.85	1.93	2.37	0.16	154	191	8	12	42.7	13.1	5.5	69	12.7
CCO33	Discovery	positive	N	1	17	Han	N	U	Mild	36.59	0		N	N	N	N		N	U	N	N	N	N	N	N	N	N	N	N	N	141	96	82	19	99		5.92	2.78	2.35	0.24	162	185	13	15	42.9	10.2	5.5	89	12.8
CCO34	Discovery	positive	N	2	27	Han	N	U	Mild	31.68	0		N	N	N	N		N	U	Y	Y	N	N	N	N	N	N	N	N	N	125	70	80	20	99		3.9	1.8	1.64	0.07	122	239	14	15	44.5	10.7	5	62	12.6
CCO35	Discovery	positive	N	2	18	Han	N	U	Mild	36.49	0		N	N	N	N		N	U	N	N	N	N	N	N	N	N	N	N	N	100	85	85	19	99		4.64	2.42	1.45	0.07	145	228	12	21	47.7	19	6.1	71	13.2
CCO36	Discovery	positive	N	2	18	Han	N	U	Mild	31.3	0		N	N	N	N		Y	U	N	N	N	N	N	N	N	N	N	N	N	112	76	73	19	99		3.13	1.38	1.4	0.09	135	179	11	36	44.6	13.7	3.2	57	11.9
CCO37	Discovery	positive	N	2	20	Han	N	U	Mild	28.78	37.24		N	N	N	N		Y	38.2	N	N	N	N	N	N	N	N	N	N	N	125	70	20	20	99		3.88	1.82	1.55	0.1	131	226	12	17	45	7.9	5.2	63	10.4
CCO38	Discovery	positive	N	2	66	Han	Y	N	Moderate	24.63	0		N	N	N	N		N	U	Y	N	N	N	N	N	Y	N	N	N	N	120	66	66	16	99		4.63	2.13	1.9	0.01	143	228	23	22	44.9	12.5	6.1	69	10.2
CCO39	Discovery	positive	N	2	43	Han	N	N	Moderate	24.59	27.84		N	N	N	N		N	U	Y	N	N	N	N	N	Y	N	N	N	N	120	80	80	20	100		3.56	1.89	1.32	0.01	122	130	12	11	43.1	31.8	4.1	73	10.5
CCO40	Discovery	positive	N	2	17	Han	N	N	Mild	28.15	0		N	N	N	N		Y	37.6	Y	Y	Y	N	N	N	N	N	N	N	N	120	80	70	16	99		2.84	1.02	1.59	0.03	110	254	9	18	41.1	7	4	72	12
CCO41	Discovery	positive	N	2	17	Han	N	N	Mild	27.02	0		N	N	N	N		N	U	Y	N	N	N	N	N	Y	N	N	N	N	96	60	66	16	99		5.35	1.4	3.27	0.23	142	157	9	13	43.8	12.4	4	70	13.2
CCO42	Discovery	positive	N	2	18	Han	N	N	Mild	34.96	0		N	N	N	N		N	U	Y	Y	N	N	N	N	Y	N	N	N	N	106	63	64	16	100		4.48	1.75	2.16	0.06	119	276	12	13	44.7	12.4	3.1	55	12.2
CCO43	Discovery	positive	N	2	17	Han	N	N	Mild	26.76	0		N	N	N	N		Y	37.7	Y	N	N	N	N	Y	Y	N	N	N	N	90	72	88	22	98		5.47	3.01	1.75	0.11	149	144	18	18	45.7	13.7	4.1	60	12.9
CCO44	Discovery	positive	N	2	35	Han	Y	N	Mild	27.27	0		N	N	N	N		N	U	N	N	N	N	N	N	N	N	N	N	N	86	66	88	22	99		8.54	6.02	1.92	0.13	117	192	14	13	39.4	11.9	1.7	54	9.4
CCO45	Discovery	positive	N	1	17	Han	Y	N	Mild	31.28	20.82		N	N	N	N		Y	38.6	N	N	N	N	N	Y	N	N	Y	N	N	120	75	84	18	100		4.21	1.83	1.58	0.19	339	215	11	15	50.6	9.6	4.1	69	11.7
CCO46	Discovery	positive	N	2	32	Han	N	N	Moderate	29.89	0		N	N	N	N		Y	39.1	N	N	N	N	N	N	N	N	N	N	N	120	74	80	18	99		3.63	1.35	1.87	0.03	127	212	25	22	42.5	7.5	3.7	55	10.3
CCO47	Discovery	positive	N	1	18	Han	Y	N	Mild	38.31	34.45		N	N	N	N		N	U	N	N	Y	N	N	N	N	N	N	N	N	120	80	64	20	98		5.56	2.98	1.49	0.28	338	173	14	21	38.5	5.1	4.4	88	12.8
CCO48	Discovery	positive	N	2	17	Han	N	N	Mild	23.39	0		N	N	N	N		N	U	N	N	N	N	N	N	N	N	N	N	N	121	72	80	20	99		7.2	3.53	2.55	0.35	124	218	10	16	39.9	4.7	5.4	62	11.5
CCO49	Discovery	positive	N	2	22	Han	N	N	Mild	37.03	0		N	N	N	N		N	U	N	N	N	N	N	N	N	N	N	N	N	120	74	80	18	99		4.74	2.58	1.71	1.2	127	242	11	15	39.8	10	4.8	67	11.8
CCO50	Discovery	positive	N	2	17	Han	N	N	Mild	27.1	32.15		N	N	N	N		N	U	Y	Y	Y	N	N	N	Y	N	N	N	N	122	72	80	20	99		7.43	3.05	3.92	0.09	127	285	13	14	48.4	7	4.4	70	11.4
CCO51	Discovery	positive	N	1	17	Han	Y	N	Mild	27.53	0		N	N	N	N		N	U	Y	N	Y	N	N	N	N	N	N	N	N	110	60	80	20	100		4.84	2.1	2.29	0.04	341	186	9	18	52.5	22.2	4.9	78	11.4
CCO52	Discovery	positive	N	1	17	Han	N	N	Mild	37.83	0		N	N	N	N		N	U	Y	N	N	N	N	N	Y	N	N	N	N	110	71	84	21	99		4.06	1.85	1.6	0.2	150	206	13	27	42.9	8.7	5.6	91	11.6
CCO53	Discovery	positive	N	2	67	Han	N	N	Moderate	31.14	0		N	N	N	N		Y	37.5	Y	N	N	N	N	N	Y	N	N	N	N	120	80	80	20	99		4.71	2.18	1.91	0.02	132	158	17	23	40.9	12.3	4.3	62	10.3
CCO54	Discovery	positive	N	1	18	Han	N	N	Mild	33.33	0		N	N	N	N		N	U	Y	N	N	N	N	N	Y	N	N	N	N	110	65	80	20	99		7.07	4	2.51		167	245	25	18	45.1	13.4	6.1	87	13.1
CCO55	Discovery	positive	N	2	17	Han	N	N	Mild	35.99	0		N	N	N	N		N	U	Y	Y	Y	N	N	N	N	N	N	N	N	130	80	90	26	100		5.51	3.05	2.04	0.07	158	228	20	15	45.8	12.6	2.9	46	10.8
CCO56	Discovery	positive	N	2	18	Han	N	N	Mild	37.87	0		N	N	N	N		Y	38.1	N	N	Y	Y	N	N	N	N	N	N	N	110	72	88	22	99		4.05	1.75	1.89	0.08	136	250	7	13	43.2	9.8	4.1	63	10.5
CCO57	Discovery	positive	N	2	18	Han	N	N	Mild	32.62	0		N	N	N	N		Y	37.6	Y	N	Y	Y	N	N	Y	N	N	N	Y	113	73	88	22	99		6.76	2.57	3.54	0.24	129	262	16	16	46.1	9.4	4.6	64	11.6
CCO58	Discovery	positive	N	1	19	Han	N	N	Moderate	34.32	0		N	N	N	N		Y	38.6	Y	N	N	N	N	N	Y	N	N	N	N	125	70	74	18	100		7.26	3.69	2.81	0.14	158	295	28	29	45.2	15.3	5.3	88	11.2
CCO59	Discovery	positive	N	2	32	Han	Y	N	Moderate	28.55	31.71		N	N	N	N		Y	37.4	Y	N	N	N	N	Y	Y	N	N	N	N	120	80	64	20	98		4.24	2.57	1.26	0	142	258	45	22	50.7	6.4	2.9	63	11
CCO60	Discovery	positive	N	2	17	Han	N	N	Moderate	35.16	0		N	N	N	N		Y	37.9	Y	N	N	N	N	N	Y	N	N	N	N	130	80	90	26	99		4.35	2.95	0.91	0.17	123	211	7	14	41.1	11.4	3.8	56	11.8
CCO61	Discovery	positive	N	2	49	Han	Y	N	Moderate	36.4	0		N	N	N	N		Y	38	Y	N	N	N	N	Y	Y	N	N	N	N	143	74	88	20	98		4.52	2.19	1.64	0.02	337	259	28	25	39.8	4.7	5.4	69	10.2
CCO62	Discovery	positive	N	1	24	Han	Y	N	Mild	35.9	0		N	N	N	N		Y	37.5	Y	N	N	N	N	N	N	N	N	N	N	110	80	70	22	98		5.75	3.94	1.28	0	340	190	34	24	40.1	13.7	2.8	87	12.5
CCO63	Discovery	positive	N	1	19	Han	N	N	Mild	33.63	0		N	N	N	N		N	U	N	N	N	N	N	Y	N	N	N	N	N	126	70	66	16	100		6.8	3.87	2.36	0.09	175	224	80	36	47.7	16.5	5.7	73	11.8
CCO64	Discovery	positive	N	1	35	Han	Y	Y	Moderate	30.88	0		N	N	N	N		Y	38.5	Y	N	N	N	N	N	N	N	N	N	N	120	80	80	20	100		6.31	2.97	2.7	0.06	151	162	35	20	44.4	6.5	3	77	11.1
CCO65	Discovery	positive	N	1	17	Han	N	N	Mild	30.81	0		N	N	N	N		Y	37.7	Y	Y	Y	N	N	N	Y	N	N	N	N	121	71	92	23	99		5.46	2.21	2.78	0.14	158	227	69	47	44.2	14.3	5.3	104	12.3
CCO66	Discovery	positive	N	1	18	Han	N	Y	Mild	29.97	33.82		N	N	N	N		Y	37.5	Y	N	Y	N	N	N	Y	N	N	N	N	128	74	84	22	99		6.38	4.02	1.67	0.15	140	262	12	17	44.4	12.4	5.1	70	12.1
CCO67	Discovery	positive	N	2	17	Han	N	N	Mild	0	0		N	N	N	N		Y	39.4	Y	Y	N	N	N	N	Y	N	N	N	N	120	66	66	16	99		7.44	3.58	3.1	0.29	114	257	13	16	42.3	11.5	4.5	67	10.9
CCO68	Discovery	positive	N	2	18	Han	N	N	Mild	32.19	0		N	N	N	N		N	U	Y	Y	N	N	N	N	Y	N	N	N	N	120	66	66	16	100		6.71	3.57	2.16	0.18	118	255	10	16	37.4	6.5	3.3	82	10.1
CCO69	Discovery	positive	N	2	70	Han	Y	N	Mild	26.023	32.69		N	N	N	N		N	U	Y	N	N	N	N	N	N	N	N	N	N	120	60	72	20	99		4.41	2.68	1.43	0.02	339	95	25	32	41	19	4.5	69	11.5
CCO70	Discovery	positive	N	2	84	Han	N	N	Moderate	30.57	32.67		N	N	N	N		N	U	Y	N	N	N	N	N	Y	N	N	N	N	139	77	74	16	98		5.58	2.8	2.38	0.085	122	182	20	24	36.4	8.8	3.8	77	11
CCO71	Discovery	positive	N	2	52	Han	N	N	Mild	26.14	35.58		N	N	N	N		N	U	N	N	N	N	N	N	N	N	N	N	N	145	89	88	16	97		3.61	2.07	0.89	0.23	123	215	17	13	37.3	11	3.8	62	11.9
CCO72	Discovery	positive	N	1	62	Han	N	Y	Mild	28.13	0		N	N	N	N		N	U	N	N	N	N	N	Y	N	N	N	N	N	155	101	82	17	98		9.12	4.45	2.99	0.02	151	169	19	18	48.8	11.2	4.3	75	12.3
CCO73	Discovery	positive	N	1	18	Han	N	N	Mild	32.28	0		N	N	N	N		N	U	Y	N	N	N	N	N	Y	N	N	N	N	102	68	75	16	99		5.27	1.94	2.6	0.28	164	171	59	22	43.9	8.9	5.1	67	11.7
CCO74	Discovery	positive	N	1	17	Han	N	N	Mild	35.07	0		N	N	N	N		N	U	Y	N	N	N	N	N	N	N	N	N	N	100	60	74	18	97		8.92	6.02	1.86	0.32	162	292	43	23	42.8	8.5	3.2	65	11.6
CCO75	Discovery	positive	N	2	18	Han	N	N	Mild	27.47	36.29		N	N	N	N		N	U	Y	N	N	N	N	N	N	N	N	N	N	108	67	81	16	98		3.72	1.59	1.65	0.1	141	204	18	20	43.6	14.2	3.8	61	12.1
CCO76	Discovery	positive	N	2	17	Han	N	N	Mild	30.88	0		N	N	N	N		N	U	N	N	N	N	N	N	N	N	N	N	N	103	62	76	17	99		2.89	1.21	1.39	0.01	147	203	30	18	43.8	8.2	3.8	67	19.2
CCO77	Discovery	positive	N	1	18	Han	N	N	Mild	29.5	0		N	N	N	N		N	U	N	N	N	N	N	N	N	N	N	N	N	98	64	78	16	97		4.34	1.65	2.41	0.1	163	216	9	15	48.1	11.3	4.6	70	15.4
CCO78	Discovery	positive	N	2	18	Han	N	N	Mild	35.43	0		N	N	N	N		N	39.2	N	N	N	N	N	N	N	N	N	N	N	100	64	64	18	98		7.37	3.21	2.83	0.49	135	174	14	15	41.7	11.8	3.1	54	12.3
CCO79	Discovery	positive	N	2	18	Han	N	N	Mild	35.75	0		N	N	N	N		N	U	N	N	N	N	N	N	N	N	N	N	N	98	68	68	16	99		6.44	3.73	2	0.05	150	140	17	17	43.8	8.2	3.8	67	10.6
CCO80	Discovery	positive	N	1	17	Han	N	N	Mild	30.83	0		N	N	N	N		N	U	N	N	N	N	N	Y	N	N	N	N	N	106	65	76	17	97		4.7	2.13	2.19	0.04	163	172	32	23	50.8	9.7	4.4	74	14.1
CCO81	Discovery	positive	N	2	17	Han	N	N	Mild	34.06	0		N	N	N	N		N	U	Y	N	N	N	N	N	N	N	N	N	N	98	63	73	16	98		4.44	1.59	2.52	0.03	137	200	7	13	40	8.3	3.3	55	19
CCO82	Discovery	positive	N	1	17	Han	N	N	Mild	34.67	0		N	N	N	N		N	U	Y	N	N	N	N	N	N	N	N	N	N	92	64	79	18	99		5.05	2.21	2.38	0.09	179	168	26	24	44.1	11.8	3.9	59	13.7
CCO83	Discovery	positive	N	1	17	Han	N	N	Mild	30.3	0		N	N	N	N		N	U	N	N	N	N	N	N	N	N	Y	N	N	124	68	75	16	97		4.32	1.54	2.14	0.2	151	147	9	21	42.8	9.4	3.7	59	14.3
CCO84	Discovery	positive	N	1	17	Han	N	N	Mild	34.4	0		N	N	N	N		N	U	N	N	N	N	N	Y	N	N	N	N	N	100	65	80	17	98		6.11	2.6	3.09	0.1	160	224	13	16	41.4	9.5	3.2	71	13.3
CCO85	Discovery	positive	N	2	18	Han	N	N	Mild	32.22	0		N	N	N	N		N	U	Y	N	N	N	N	N	N	N	N	N	N	118	65	82	16	99		6.77	2.93	3.46	0	171	288	20	18	47.6	14	3.3	71	13.9
CCO86	Discovery	positive	N	1	18	Han	N	N	Mild	36.59	0		N	N	N	N		N	U	N	N	N	N	N	N	N	N	N	N	N	112	69	80	18	97		5.79	3.61	1.6	0.12	164	218	10	15	43.4	11.6	3.9	59	11.9
CCO87	Discovery	positive	N	1	18	Han	N	N	Mild	32.56	0		N	N	N	N		N	U	N	N	N	N	N	N	N	N	N	N	N	126	74	76	16	98		6.74	2.97	3.07	0.11	174	235	73	34	43.3	19	4.4	78	15.3
CCO88	Discovery	positive	N	1	17	Han	N	N	Mild	35.2	0		N	N	N	N		N	38.7	N	N	N	N	N	N	N	N	N	N	N	110	65	79	17	99		4.7	1.4	2.98	0.06	157	190	9	15	43.2	8.3	4.3	59	11.8
CCO89	Discovery	positive	N	2	17	Han	N	N	Mild	36.35	0		N	N	N	N		N	U	N	N	N	N	N	N	N	N	N	N	N	108	67	76	18	98		4.73	2.28	1.86	0.09	115	233	24	17	39.5	7.6	4.3	54	12.3
CCO90	Discovery	positive	N	1	18	Han	N	N	Mild	27.45	35.47		N	N	N	N		N	36.3	N	N	Y	N	N	N	N	N	N	N	N	125	75	75	18	99		6.54	3.22	2.69	0.01	165	284	38	37	48.2	13.4	4.4	68	12.3
CCO91	Discovery	positive	N	1	17	Han	N	N	Mild	38	0		N	N	N	N		N	36.5	N	N	N	N	N	N	N	N	N	N	N	130	80	78	17	99		5.64	3.19	2.03	0.07	188	186	37	20	42.4	15.5	12.2	20	12.2
CCO92	Discovery	positive	N	1	18	Han	N	N	Mild	34.62	0		N	N	N	N		N	36.4	N	N	N	N	N	N	N	N	N	N	N	120	75	75	18	99		5.62	2.6	2.44	0.03	171	168	9	15	44	14.8	40	76	14
CCO93	Discovery	positive	N	2	17	Han	N	N	Mild	29.34	0		N	N	N	N		N	36.7	N	N	N	N	N	N	N	N	N	N	N	125	70	70	17	99		4.01	1.69	2.61	0.12	135	214	4	10	43.2	11.2	2.7	60	12.6
CCO94	Discovery	positive	N	2	18	Han	N	N	Mild	33.25	0		N	N	N	N		N	36.5	N	N	N	N	N	N	N	N	N	N	N	120	77	78	18	100		4.08	1.7	1.99	0.02	136	229	8	11	45.2	17.1	2.7	59	17.1
CCO95	Discovery	positive	N	2	18	Han	N	N	Mild	36.23	0		N	N	N	N		N	36.4	N	N	N	N	N	N	N	N	N	N	N	128	75	75	19	100		3.22	1.22	1.73	0.03	114	264	7	16	36.5	5.1	3.6	67	12.5
CCO96	Discovery	positive	N	1	17	Han	N	N	Mild	35.45	0		N	N	N	N		N	36.2	N	N	N	N	N	N	N	N	N	N	N	125	70	72	17	99		6.1	2.59	2.59	0.11	168	157	47	18	38.2	16.6	4	66	11.7
CCO97	Discovery	positive	N	1	18	Han	N	N	Mild	29.21	0		N	N	N	N		N	36.5	N	N	N	N	N	N	N	N	N	N	N	127	77	76	18	100		5.01	2.01	2.55	0.06	181	207	36	19	44.6	15.3	3.6	71	14.1
CCO98	Discovery	positive	N	2	18	Han	N	N	Moderate	0	0		N	N	N	N		N	36.7	N	N	N	N	N	N	N	N	N	N	N	128	70	75	18	99		3.77	1.28	2.01	0.31	126	205	8	11	42.6	12.9	2.9	62	13.8
CCO99	Discovery	positive	N	1	17	Han	N	N	Moderate	35.19	0		N	N	N	N		N	37	N	N	N	N	N	N	N	N	N	N	N	125	75	78	18	99		3.45	1.33	1.74	0	148	160	10	15	45	10.3	4.3	77	11.9
CCO100	Discovery	positive	N	2	22	Han	N	N	Moderate	33.31	0		N	N	N	N		N	36.8	N	N	N	N	N	N	N	N	N	N	N	120	70	79	19	100		4.41	2	1.79	0.22	129	182	6	13	45.6	8.5	3.7	66	14.1
CCO101	Discovery	positive	N	1	18	Han	N	N	Moderate	27.62	38.59		N	N	N	N		Y	38.5	Y	N	N	N	N	N	N	N	N	N	N	125	75	75	17	99		4.88	2.2	1.91	0.03	167	150	22	20	49.2	9.5	6.3	80	12
CCO102	Discovery	positive	N	2	17	Han	N	N	Mild	0	0		N	N	N	N		N	36.2	N	N	N	N	N	N	N	N	N	N	N	120	70	76	18	99		3.58	0.97	2.13	0.17	135	212	12	14	37.9	11	2.7	53	17.6
CCO103	Discovery	positive	N	2	36	Han	N	N	Moderate	22.02	29.05		N	N	N	N		N	36.8	N	N	N	N	N	N	N	N	N	N	N	125	75	75	17	100		4.43	2..8	1.55	0.02	147	251	233	68	41.8	6.8	3.2	56	13.2
CCO104	Discovery	positive	N	2	18	Han	N	N	Mild	35.82	0		N	N	N	N		Y	38.5	Y	N	N	N	N	N	Y	N	N	N	N	111	82	80	19	100		5.32	2.43	2.14	0.15	129	225	13	19	48	5.6	5.5	63	11.5
CCO105	Discovery	positive	N	2	18	Han	N	N	Mild	33.27	0		N	N	N	N		Y	38.8	Y	Y	Y	N	N	N	N	N	N	N	N	101	80	79	21	98		4.24	2.24	1.37	0.25	131	175	9	15	43.9	7.6	5.1	65	12.3
CCO106	Discovery	positive	N	2	27	Han	N	N	Mild	31.56	0		N	N	N	N		Y	38.5	Y	N	N	N	N	N	Y	N	N	N	N	U	U	75	18	99		5.12	1.73	2.59	0.03	141	177	8	13	42	16.8	2.9	74	11.9
CCO107	Discovery	positive	N	2	65	Han	N	N	Mild	26.04	0		N	N	N	N		N	U	Y	N	N	N	N	N	Y	N	N	N	N	111	82	80	19	99		5.43	2.96	2	0.11	152	165	34	24	36.2	10.4	3.8	64	11.1
CCO108	Discovery	positive	N	2	78	Han	N	N	Mild	29.57	0		N	N	N	N		Y	37.2	Y	Y	N	N	N	N	N	N	N	N	N	130	90	98	24	100		4.6	2.18	2.11	0.02	157	204	9	16	42.1	21.1	5.2	62	10.9
CCO109	Discovery	positive	N	2	62	Han	N	N	Mild	29.77	0		N	N	N	N		Y	37.3	Y	Y	N	N	N	N	N	N	N	N	N	150	90	103	25	100		3.4	1.23	1.67	0.15	138	149	25	21	42.5	22.1	4.3	48	10.6
CCO110	Discovery	positive	N	2	64	Han	N	N	Mild	35.71	0		N	N	N	N		N	36.8	N	N	N	N	N	N	N	N	N	N	N	120	80	76	20	96		3.73	1.32	2.01	0.01	159	173	15	23	25.4	12.4	3.3	61	11.7
CCO111	Discovery	positive	N	2	18	Han	N	N	Mild	36.36	0		N	N	N	N		N	36.5	Y	Y	Y	N	N	N	N	N	Y	N	N	113	82	80	19	96		2.94	0.9	1.59	0.15	144	192	10	13	25.9	9.7	3.7	65	11.8
CCO112	Discovery	positive	N	2	52	Han	N	N	Moderate	29.33	0		N	N	N	N		N	36.2	Y	N	N	N	N	N	Y	N	N	N	N	120	82	80	19	96		4.5	1.33	2.4	0.09	129	262	19	22	36.6	7.9	2.9	52	11.3
CCO113	Discovery	positive	N	2	38	Han	N	N	Mild	32.42	0		N	N	N	N		N	36.2	Y	N	N	N	N	N	N	N	N	N	N	120	80	76	20	100		4.83	2.64	1.69	0.17	136	164	41	24	40.8	9.8	2.8	59	11.1
CCO114	Discovery	positive	N	1	53	Han	N	N	Mild	35.8	0		N	N	N	N		N	36.5	N	N	N	N	N	N	N	N	N	N	N	120	80	76	20	99		6.23	6.23	1.93	0.07	167	135	55	36	38.2	23.1	5.3	78	11.4
CCO115	Discovery	positive	N	2	24	Han	N	N	Mild	35.04	0		N	N	N	N		Y	38.5	Y	N	N	N	N	N	Y	N	N	N	N	115	75	71	19	98		4.67	2.22	1.91	0.08	154	170	16	11	44.1	9.7	2.9	67	12.1
CCO116	Discovery	positive	N	2	62	Han	N	N	Mild	18.94	26.88		N	N	N	N		N	36.5	N	N	Y	N	N	N	Y	N	N	N	N	110	71	81	17	99		4.14	3.97	1.6	0	146	190	27	30	37.8	19.6	3	61	10.6
CCO117	Discovery	positive	N	1	32	Han	N	N	Mild	32.14	0		N	N	N	N		Y	38.5	Y	N	N	N	N	N	Y	N	N	N	N	104	70	86	19	99		5.73	3.67	1.18	0.14	167	213	42	26	41.6	10	2.4	69	11.6
CCO118	Discovery	positive	N	1	50	Han	N	N	Mild	34.74	0		N	N	N	N		N	36.2	Y	N	N	N	N	N	N	N	N	N	N	111	82	80	19	100		3.45	1.95	1.28	0.04	133	142	27	22	40.3	9.6	4.6	76	11.4
CCO119	Discovery	positive	N	2	19	Han	N	N	Mild	32.48	0		N	N	N	N		Y	38	Y	N	Y	N	N	N	Y	N	N	N	N	107	63	79	18	100		5.32	2.86	1.81	3.8	111	267	14	13	45.9	10.7	4.1	62	13
CCO120	Discovery	positive	N	2	40	Han	N	N	Mild	30.04	0		N	N	N	N		N	36.9	Y	N	N	N	N	N	Y	N	N	N	N	111	82	80	19	98		5.02	1.96	2.54	0.08	135	255	12	13	41.4	16.9	3.7	73	12
CCO121	Discovery	positive	N	2	19	Han	N	N	Mild	33.5	0		N	N	N	N		N	37.1	Y	N	N	N	N	N	Y	N	N	N	N	118	82	71	19	99		4.55	2.16	1.96	0.09	131	222	20	14	38.2	11.2	3	59	11.5
CCO122	Discovery	positive	N	2	18	Han	N	N	Mild	28.17	0		N	N	N	N		Y	38.5	Y	N	N	N	N	N	Y	N	N	N	N	115	75	75	18	99		4.63	2.81	1.44	0.07	129	225	13	15	43	6.1	3.4	55	11.5
CCO123	Discovery	positive	N	1	45	Han	N	N	Mild	24.5	0		N	N	N	N		Y	37.2	Y	Y	N	N	Y	N	N	N	N	N	N	101	62	82	17	100		5.12	3.23	1.26	0.18	159	161	44	25	45.7	12.5	2.6	67	11.2
CCO124	Discovery	positive	N	2	18	Han	N	U	Mild	35.99	0		N	N	N	N		N	36.5	Y	N	N	N	N	N	N	N	N	N	N	120	80	76	20	93		5.98	3.26	2.07	0.14	153	183	7	15	46.2	15.2	3.5	69	14.1
CCO125	Discovery	positive	N	2	17	Han	N	U	Mild	35.02	0		N	N	N	N		N	36.4	Y	Y	Y	N	N	N	N	N	N	N	N	100	70	80	19	100		5.39	2.53	2.04	0.12	152	219	30	24	41.3	8.7	4.6	72	11.7
CCO126	Discovery	positive	N	2	77	Han	N	U	Mild	27.18	0		N	N	N	N		N	36.2	N	N	N	N	N	N	N	N	N	N	N	111	82	86	19	95		7.26	4.18	2.4	0.09	118	283	8	18	36.4	13.7	3.8	59	11.9
CCO127	Discovery	positive	N	2	58	Han	N	U	Mild	28	0		N	N	N	N		N	36.8	Y	N	N	N	N	N	Y	N	N	N	N	137	82	72	19	98		6.23	4.08	1.67	0	141	244	12	19	41.2	9.9	3.9	59	12.8
CCO128	Discovery	positive	N	1	17	Han	N	U	Mild	U	U		N	N	N	N		N	37	Y	N	N	N	N	N	Y	N	N	N	N	110	80	80	19	100		4.46	1.3	2.42	0.17	153	175	16	15	44.4	6.7	3.7	75	12
CCO129	Discovery	positive	N	1	17	Han	N	U	Mild	31.56	0		N	N	N	N		N	36.7	Y	N	Y	N	N	N	N	N	N	N	N	92	43	97	19	100		5.76	2.96	2.22	0.17	151	161	13	17	47.7	16.1	5.2	77	13.5
CCO130	Discovery	positive	N	1	28	Han	N	U	Mild	28.65	32.19		N	N	N	N		N	36.6	Y	N	Y	N	N	N	N	N	N	N	N	119	79	79	19	100		4.15	1.55	2.05	0.22	164	182	46	27	38.8	13.2	2.9	76	11.2
CCO131	Discovery	positive	N	1	18	Han	N	U	Mild	28.21	0		N	N	N	N		N	36.8	Y	N	Y	N	N	N	N	N	N	N	N	110	60	80	20	100		5.18	1.76	2.89	0.12	111	209	14	21	46.2	6.2	4	81	12.8
CCO132	Discovery	positive	N	1	17	Han	N	U	Mild	35.14	0		N	N	N	N		N	37.1	N	N	N	N	N	N	N	N	N	N	N	110	60	78	19	95		5.83	2.89	2.24	0.17	181	210	25	16	47	17.3	3.4	105	11.7
CCO133	Discovery	positive	N	2	56	Han	N	U	Mild	33.86	0		N	N	N	N		N	36.6	Y	N	N	N	N	N	Y	N	N	N	N	102	72	70	19	96		3.77	1.62	1.91	0.04	128	134	17	20	40.1	13.7	4.8	54	11
CCO134	Discovery	positive	N	1	60	Han	N	U	Mild	33.53	0		N	N	N	N		N	36.5	Y	N	N	N	N	N	N	N	N	N	N	120	80	76	20	94		10.73	7.23	2.85	0.04	166	128	22	15	41.7	18.3	3.5	74	11.5
CCO135	Discovery	positive	N	2	36	Han	N	U	Mild	35.78	0		N	N	N	N		N	36.5	Y	N	N	N	N	N	N	N	N	N	N	110	71	81	17	98		4.42	2.31	1.77	0.05	142	252	81	42	43.1	10.6	2.9	56	12.2
CCO136	Discovery	positive	N	1	19	Han	N	U	Mild	30.35	0		N	N	N	N		N	36.5	Y	N	N	N	N	N	N	N	N	N	N	110	71	81	17	93		4.27	1.22	2.72	0.07	184	169	21	16	46.8	16.9	4.9	83	13.1
CCO137	Discovery	positive	N	1	19	Han	N	U	Mild	26.45	0		N	N	N	N		N	36.5	Y	N	N	N	N	N	N	N	N	N	N	120	80	82	19	96		4.01	1.66	1.82	0.12	189	184	23	19	41.1	13.2	4.3	68	12.4
CCO138	Discovery	positive	N	2	45	Han	N	U	Mild	34.01	0		N	N	N	N		Y	37.2	N	N	N	N	N	N	N	N	N	N	N	120	70	75	16	100		3.42	1.67	1.38	0	140	148	11	23	38.9	12.7	3.1	60	9.4
CCO139	Discovery	positive	N	2	45	Han	N	U	Mild	19.55	23.85		N	N	N	N		N	36.5	N	Y	N	N	N	N	N	N	N	N	N	115	69	73	19	99		4.9	2.76	1.68	0.01	142	195	31	24	42.5	25.7	5	72	11.3
CCO140	Discovery	positive	N	1	70	Han	N	N	Mild	27.43	0		N	N	N	N		N	36.2	Y	N	Y	N	N	N	N	N	N	N	N	111	82	80	19	99		4.81	2.14	2.22	0.18	155	179	103	38	37.4	7.7	3.9	64	U
CCO141	Discovery	positive	N	2	21	Han	N	N	Mild	32.05	0		N	N	N	N		Y	38	Y	N	N	N	N	N	Y	N	N	N	N	112	78	78	20	98		5.45	2.38	2.36	0.02	157	188	12	18	43.9	8.4	2.6	64	11.2
CCO142	Discovery	positive	N	2	39	Han	N	N	Mild	U	U		N	N	N	N		N	36.8	Y	N	Y	N	N	N	Y	N	N	N	N	125	80	66	18	97		4.97	2.65	1.87	0.06	144	205	7	15	45.2	15.8	3.1	62	11.2
CCO143	Discovery	positive	N	1	34	Han	Y	N	Mild	0	0		N	N	N	N		N	36.7	N	N	Y	N	N	N	N	N	N	N	N	120	80	78	18	99		3.22	1.11	1.71	0.09	144	179	15	17	44.8	8.1	4	79	10.8
CCO144	Discovery	positive	N	1	67	Han	Y	N	Mild	31.22	0		N	N	N	N		N	37	Y	N	Y	N	N	N	N	N	N	N	N	135	87	76	18	97		4.63	3.19	0.77	0.58	147	188	17	23	41.5	12.6	6.9	66	10.3
CCO145	Discovery	positive	N	1	71	Han	Y	N	Mild	30.15	0		N	N	N	N		N	36.8	Y	N	N	N	N	N	N	N	N	N	N	156	98	72	19	97		6.13	3.94	1.45	0.17	146	248	28	32	44.1	12.9	4.5	70	9.8
CCO146	Discovery	positive	N	2	44	Han	Y	N	Mild	23.5	0		N	N	N	N		N	37.1	Y	N	Y	N	N	N	N	N	N	N	N	135	80	70	18	98		4.67	2.27	1.96	0.01	156	194	26	21	42.8	14.4	3	57	11.8
CCO147	Discovery	positive	N	2	18	Han	Y	N	Mild	0	0		N	N	N	N		N	37.1	Y	N	N	N	N	N	N	N	N	N	N	110	65	68	18	100		4.62	2.4	1.86	0.01	136	163	17	14	40.2	11.1	3.2	66	13.1
CCO148	Discovery	positive	N	1	18	Han	Y	N	Mild	34.92	0		N	N	N	N		N	37	Y	N	Y	N	N	N	Y	N	N	N	N	125	76	80	18	100		6.87	3.37	3.1	0.03	171	204	22	17	47.4	16.4	3.6	94	12.1
CCO149	Discovery	positive	N	2	18	Han	Y	N	Mild	35.41	39.51		N	N	N	N		N	37	Y	N	N	N	N	N	N	N	N	N	N	100	60	68	18	98		3.71	1.91	1.45	0.1	130	107	18	21	45.9	10.6	4.3	63	10.6
CCO150	Discovery	positive	N	2	49	Han	Y	N	Mild	31.6	0		N	N	N	N		N	37	N	N	N	N	N	N	N	N	N	N	N	125	86	86	18	100		4.78	3.54	1	0.01	137	227	16	13	40.9	7.5	2.9	55	10.4
CCO151	Discovery	positive	N	1	44	Han	Y	N	Mild	27.39	39.28		N	N	N	N		N	36.6	N	N	N	N	N	N	N	N	N	N	N	125	86	86	18	100		6.5	4.89	1.05	0.03	163	230	39	28	43.4	7.4	4.3	74	12.7
CCO152	Discovery	positive	N	2	33	Han	Y	N	Mild	32.24	0		N	N	N	N		Y	37.5	Y	N	N	N	N	N	N	N	N	N	N	135	75	76	19	100		3.38	1.24	1.76	0.06	129	156	11	14	40.7	7	2.1	59	16.4
CCO153	Discovery	positive	N	2	52	Han	Y	N	Mild	31.33	0		N	N	N	N		Y	37.3	Y	N	Y	N	N	N	N	N	N	N	N	125	86	86	18	100		5.52	4.01	1.02	0	127	289	15	15	42.1	5.1	3.8	64	11.1
CCO154	Discovery	positive	N	2	34	Han	Y	N	Mild	36.6	0		N	N	N	N		N	37.1	Y	N	N	N	N	N	N	N	N	N	N	110	60	78	19	100		4.14	2.91	0.97	0.01	90	263	9	13	42	16.1	4	65	10.1
CCO155	Discovery	positive	N	1	35	Han	Y	N	Mild	36.81	38.31		N	N	N	N		Y	37.2	Y	N	Y	N	N	N	N	N	N	N	N	130	80	92	22	100		4.65	2.65	1.75	0.04	143	248	52	32	44.4	11.2	4.9	82	11
CCO156	Discovery	positive	N	1	17	Han	Y	N	Mild	0	0		N	N	N	N		Y	38.5	Y	N	Y	N	N	N	Y	N	N	N	N	125	80	84	20	96		8.3	6.66	1.09	0.06	168	220	18	13	42.8	22.3	6.3	98	12.2
CCO157	Discovery	positive	N	1	54	Han	Y	Y	Mild	35.23	0		N	N	N	N		N	37	Y	N	N	N	N	N	Y	N	N	N	N	110	70	84	20	95		4.45	3.15	0.86	0.04	174	138	120	76	45.1	45.7	6.5	69	11.4
CCO158	Discovery	positive	N	2	35	Han	Y	N	Mild	32.35	0		N	N	N	N		N	36.6	Y	N	N	N	N	N	Y	N	N	N	N	130	85	76	19	98		6.3	3.15	2.68	0.07	144	192	21	16	38.9	18.4	3.1	77	9.2
CCO159	Discovery	positive	N	1	37	Han	Y	Y	Mild	33.3	0		N	N	N	N		N	36.8	Y	N	N	N	N	N	Y	N	N	N	N	140	80	78	19	97		5.67	2.12	2.58	0.02	178	244	65	44	48.9	17.4	2.9	81	10.9
CCO160	Discovery	positive	N	1	22	Han	N	Y	Mild	34.66	0		N	N	N	N		Y	37.4	N	N	N	N	N	N	N	N	N	N	N	120	65	78	20	97		4.94	2.98	1.5	0.08	168	216	41	21	44.2	7.3	4	97	10.4
CCO161	Discovery	positive	N	2	72	Han	N	N	Mild	24.32	33.51		N	N	N	N		Y	38.3	Y	Y	N	N	N	N	N	N	N	N	N	120	66	84	21	97		4.21	1.36	2.43	0.03	132	215	21	25	44.3	8.3	4	65	10.3
CCO162	Discovery	positive	N	1	38	Han	Y	N	Mild	31.82	0		N	N	N	N		Y	37.9	Y	N	N	N	N	N	Y	N	N	N	N	130	75	80	20	97		5.05	2.56	2.09	0	166	202	12	17	40.7	10.7	4.9	81	12.3
CCO163	Discovery	positive	N	1	18	Han	Y	N	Mild	33.39	0		N	N	N	N		N	37	Y	N	N	N	N	N	Y	N	N	N	N	115	60	70	19	99		5.55	3.07	1.56	0.33	170	218	16	16	41.7	10.8	4.5	81	12.3
CCO164	Discovery	positive	N	1	17	Han	Y	N	Mild	31.16	0		N	N	N	N		N	37.1	Y	Y	Y	N	N	N	Y	N	N	N	N	118	65	80	20	99		4.49	2.24	1.52	0.25	164	235	44	25	44.8	12	3.3	86	12.2
CCO165	Discovery	positive	N	1	18	Han	Y	N	Mild	0	0		N	N	N	N		N	36.8	N	N	Y	N	N	N	N	N	N	N	N	100	60	76	20	96		6.86	3.45	2.59	0.03	188	231	9	15	51.3	15.5	4.8	93	11.4
CCO166	Discovery	positive	N	2	17	Han	Y	N	Mild	35.13	0		N	N	N	N		Y	37.2	Y	N	N	N	N	N	Y	N	N	N	N	120	65	64	16	96		3.34	1.09	1.88	0.05	143	129	9	15	42.9	8.9	3.6	75	10.1
CCO167	Discovery	positive	N	2	67	Han	Y	N	Mild	34.66	0		N	N	N	N		N	36.2	Y	N	N	N	N	N	Y	N	N	N	N	138	76	72	18	95		3.16	0.87	1.92	0.05	113	188	13	27	42.9	8.3	3.4	59	10.8
CCO168	Discovery	positive	N	2	50	Han	Y	N	Mild	30.6	0		N	N	N	N		N	37	Y	N	N	N	N	N	N	N	N	N	N	125	68	80	20	96		2.52	0.96	1.09	0.04	139	197	21	20	45.2	12.3	3.7	64	10.3
CCO169	Discovery	positive	N	2	70	Han	Y	N	Mild	35.6	0		N	N	N	N		N	37	N	N	N	N	N	N	N	N	N	N	N	140	75	76	20	95		4.31	2.16	1.68	0.14	136	221	28	23	39.9	12.3	4.3	51	10.7
CCO170	Discovery	positive	N	2	17	Han	Y	N	Mild	27.82	35.51		N	N	N	N		N	37	Y	N	Y	N	N	N	N	N	N	N	N	125	76	80	18	97		2.83	1.04	1.35	0.06	134	272	13	20	44.3	7.6	3	62	15.4
CCO171	Discovery	positive	N	1	56	Han	N	N	Moderate	0	0		N	N	N	N		N	U	N	N	N	N	N	N	N	N	N	N	N	125	86	86	18	100		6.5	3.96	2.13	0.05	158	206	20	25	41.4	11.3	6.1	81	11.9
CCO172	Discovery	positive	N	2	22	Han	Y	N	Moderate	0	0		N	N	N	N		N	U	Y	N	N	N	N	N	Y	N	N	N	N	114	69	75	20	96		6.93	3.33	2.72	0.23	142	260	89	58	42.8	19.9	4.2	63	12.6
CCO173	Discovery	positive	N	2	52	Han	Y	N	Mild	33.27	0		N	N	N	N		N	U	N	N	N	N	N	N	N	N	N	N	N	122	82	76	20	99		5.4	3.41	1.43	0.03	135	230	17	13	39.9	11.7	4.8	52	11.9
CCO174	Discovery	positive	N	1	17	Han	N	Y	Mild	24.88	28.78		N	N	N	N		N	U	Y	N	N	N	N	N	N	N	N	N	N	117	69	72	19	99		3.75	2.37	1.06	0.12	161	146	9	15	38.6	14.2	4	91	10.6
CCO175	Discovery	positive	N	2	18	Han	N	N	Mild	30.46	0		N	N	N	N		N	U	Y	N	Y	N	N	N	Y	N	N	N	N	115	76	68	17	97		4.54	2.18	1.97	0	152	189	18	13	46.7	24.4	4	67	11.1
CCO176	Discovery	positive	N	1	29	Han	Y	Y	Mild	32.67	35.91		N	N	N	N		N	U	N	N	N	N	N	N	N	N	N	N	N	115	82	74	19	99		4.84	2.18	1.58	0.12	169	180	30	16	45.7	14.5	6.5	101	9.6
CCO177	Discovery	positive	N	2	51	Han	Y	N	Mild	31.48	33.91		N	N	N	N		Y	38	Y	N	Y	N	Y	N	N	N	N	N	N	110	80	72	18	99		4.28	2.46	1.54	0.02	131	164	30	29	44.7	12.6	2.9	61	9.5
CCO178	Discovery	positive	N	1	17	Han	N	N	Mild	23.83	26.51		N	N	N	N		N	U	Y	N	Y	N	N	N	N	N	N	N	N	109	64	80	19	99		6.1	3.41	2.21	0.07	171	285	12	17	45.8	15.9	5.2	85	11.5
CCO179	Discovery	positive	N	1	73	Han	Y	N	Mild	27.39	29.44		N	N	N	N		N	U	Y	N	N	N	N	N	N	N	N	N	N	138	72	80	18	97		2.79	1.91	0.56	0.1	167	115	20	16	44	19.7	6.4	88	11.7
CCO180	Discovery	positive	N	2	43	Han	Y	N	Mild	20.84	23.45		N	N	N	N		N	U	Y	N	Y	N	N	N	Y	N	N	N	N	116	80	82	18	96		3.56	2.03	1.1	0.09	154	179	15	22	41.1	24.8	4.3	74	10
CCO181	Discovery	positive	N	2	34	Han	Y	N	Mild	28.77	33.58		N	N	N	N		N	U	N	N	N	N	N	N	N	N	N	N	N	126	76	72	17	99		2.57	1.43	0.81	0.02	134	206	11	13	39.2	12.1	2.1	75	10.5
CCO182	Discovery	positive	N	2	18	Han	N	N	Mild	35.48	0		N	N	N	N		N	U	Y	N	N	N	N	N	Y	N	N	N	N	111	67	74	18	96		4.42	2.3	1.75	0.14	118	231	7	16	44.6	12.8	4.4	70	11.4
CCO183	Discovery	positive	N	2	17	Han	N	N	Mild	32.01	0		N	N	N	N		N	U	Y	N	N	N	N	N	N	N	N	N	N	102	67	72	19	98		3.45	1.82	1.26	0.14	147	159	12	13	45.2	20.4	4	79	12.6
CCO184	Discovery	positive	N	2	18	Han	N	N	Mild	35.39	0		N	N	N	N		N	U	Y	N	Y	N	N	N	N	N	N	N	N	108	72	84	19	98		3.15	1.11	1.71	0.03	121	195	9	14	48.6	9.5	4	75	9.5
CCO185	Discovery	positive	N	2	17	Han	N	N	Mild	26.27	31		N	N	N	N		N	U	Y	N	Y	N	N	N	Y	N	N	N	N	100	62	80	21	99		5.29	2.95	1.86	0.07	151	217	7	13	38.6	10.1	4.7	75	11
CCO186	Discovery	positive	N	1	18	Han	N	N	Mild	30.56	0		N	N	N	N		N	U	N	N	Y	N	N	N	N	N	N	N	N	106	64	78	18	100		5.79	2.82	2.42	0.13	168	174	20	16	46.3	11.3	4.5	83	11.8
CCO187	Discovery	positive	N	1	18	Han	N	N	Mild	32.15	0		N	N	N	N		N	U	N	N	N	N	N	N	N	N	N	N	N	108	63	72	19	94		5.69	2.15	2.55	0.23	168	169	16	16	42.1	28.3	7.2	87	11.5
CCO188	Discovery	positive	N	2	19	Han	N	N	Mild	26.51	30.91		N	N	N	N		N	U	N	N	N	N	N	N	N	N	N	N	N	108	72	72	22	100		6.33	3.95	1.72	0.05	143	210	22	15	43.9	8.1	3.3	61	10.5
CCO189	Discovery	positive	N	2	17	Han	N	N	Mild	29.61	0		N	N	N	N		N	U	Y	N	Y	N	N	N	Y	N	N	N	N	105	68	76	20	100		7.63	5.24	1.98	0.01	140	178	8	13	43.5	16.4	4.8	74	11.4
CCO190	Discovery	positive	N	2	53	Han	Y	N	Mild	30.67	32.51		N	N	N	N		N	U	N	N	N	N	N	N	N	N	N	N	N	125	81	78	19	97		3.81	1.94	1.52	0.08	129	128	20	18	40.3	10.6	4.5	82	9.4
CCO191	Discovery	positive	N	2	51	Han	Y	N	Mild	25.34	28.3		N	N	N	N		Y	37.8	N	N	N	N	N	N	N	N	N	N	N	123	70	70	19	98		4	1.64	2.02	0.12	126	108	99	106	41.2	9.6	3.3	64	8.3
CCO192	Discovery	positive	N	2	35	Han	Y	N	Mild	32.34	0		N	N	N	N		N	U	Y	N	N	N	N	N	Y	N	N	N	N	117	87	76	18	100		5.02	3.07	1.72	0.01	155	184	30	40	41.5	12.8	4.1	70	9.9
CCO193	Discovery	positive	N	2	49	Han	Y	N	Mild	27.29	29.44		N	N	N	N		N	U	Y	N	N	N	N	N	N	N	N	N	N	123	73	84	21	98		4.37	2.34	1.69	0	148	233	33	25	40.4	9.7	3	69	12.2
CCO194	Discovery	positive	N	2	64	Han	Y	N	Mild	18.04	28.27		N	N	N	N		N	U	Y	N	N	N	N	N	Y	N	N	N	N	117	87	72	17	97		3.91	2.71	0.97	0.05	123	98	19	19	42.9	38.8	3.1	78	9.3
CCO195	Discovery	positive	N	2	34	Han	Y	N	Mild	15.43	18.87		N	N	N	N		Y	38.7	Y	N	N	Y	Y	Y	Y	N	Y	N	N	125	85	80	20	96		5.01	3.69	0.62	0.01	121	199	143	61	44.9	5.3	3.3	73	10.7
CCO196	Discovery	positive	N	1	39	Han	Y	Y	Mild	33.87	0		N	N	N	N		N	U	N	N	N	N	N	N	N	N	N	N	N	110	73	88	23	95		5.54	2.46	2.47	0.19	149	188	27	22	41.3	10.6	6.7	80	11
CCO197	Discovery	positive	N	2	65	Han	Y	N	Mild	29.24	32.54		N	N	N	N		N	U	N	N	N	N	N	N	N	N	N	N	N	162	89	82	20	95		2.87	1.57	0.92	0.01	124	104	10	12	36.6	12.6	4.5	75	10.9
CCO198	Discovery	positive	N	1	17	Han	N	N	Mild	36.23	0		N	N	N	N		N	U	N	N	N	N	N	N	N	N	N	N	N	105	63	84	21	94		4.45	2.74	1.07	0.15	174	168	6	14	43.3	16	3.9	101	12.9
CCO199	Validation	positive	N	1	69	Han	Y	N	Mild	34.37	0		N	N	N	N		N	U	N	N	N	N	N	N	N	N	N	N	N	136	86	92	22	96		9.55	5.41	3.5	0.17	159	124	23	25	41.6	13.7	6.3	79	11.23
CCO200	Validation	positive	N	1	19	Han	N	N	Mild	31.81	0		N	N	N	N		N	U	N	N	N	N	N	N	N	N	N	N	N	106	69	80	20	100		6.39	2.73	2.65	0.38	175	147	247	127	42.4	23.4	4.4	96	11.9
CCO201	Validation	positive	N	2	44	Han	Y	N	Mild	27.51	31.03		N	N	N	N		N	U	N	N	N	N	N	N	Y	N	N	N	N	113	76	82	19	99		7.73	5.3	1.65	0.07	135	273	11	14	42.6	13.2	3.6	69	11.4
CCO202	Validation	positive	N	1	18	Han	N	N	Mild	24.56	29.38		N	N	N	N		N	U	N	N	N	N	N	N	N	N	N	N	N	104	66	76	22	98		7.44	3.82	2.57	0.4	162	153	18	16	43.6	10.4	5.8	105	11.23
CCO203	Validation	positive	N	2	36	Han	Y	N	Mild	22.6	27.16		N	N	N	N		Y	38.5	Y	N	N	N	N	N	Y	N	N	N	N	127	65	85	19	98		7.58	5.09	1.56	0.06	126	238	18	23	42.1	11.1	3	59	13
CCO204	Validation	positive	N	1	17	Han	Y	N	Mild	21.42	25.38		N	N	N	N		N	U	Y	N	N	N	N	N	N	N	N	N	N	112	60	80	20	98		5.39	2.64	1.95	0.07	157	160	12	16	47.4	18.2	3.3	102	9.3
CCO205	Validation	positive	N	2	17	Han	Y	N	Mild	27.29	35.92		N	N	N	N		Y	38.5	Y	N	N	N	N	N	Y	N	N	N	N	132	60	82	21	97		4.42	1.82	2.02	0.16	143	220	7	17	42.9	13.1	3.2	78	8.7
CCO206	Validation	positive	N	1	19	Han	Y	Y	Mild	21.46	26.78		N	N	N	N		Y	38.5	N	N	N	N	N	N	N	N	N	N	N	118	65	80	20	98		5.27	3.1	1.24	0.06	160	266	33	23	45.1	9.5	5.4	79	10.5
CCO207	Validation	positive	N	2	17	Han	Y	N	Mild	35.49	0		N	N	N	N		Y	38	Y	N	N	N	N	N	Y	N	N	N	N	116	82	80	20	98		5.63	1.67	3.47	0.1	135	303	52	46	41.5	4.1	3.4	66	11.1
CCO208	Validation	positive	N	2	17	Han	Y	N	Mild	34.11	0		N	N	N	N		N	U	Y	N	N	N	N	N	N	N	N	N	N	125	62	80	20	98		6.68	3.11	3.05	0.1	123	282	15	16	49.7	10.6	3.4	65	9.9
CCO209	Validation	positive	N	1	18	Han	Y	N	Mild	36.02	0		N	N	N	N		Y	37.5	Y	N	Y	N	N	N	N	N	N	N	N	132	60	70	20	98		6.68	2.55	3.52	0.14	162	188	21	16	45.8	18.4	4.1	87	9.8
CCO210	Validation	positive	N	1	17	Han	Y	N	Mild	24.25	33.62		N	N	N	N		Y	39.5	Y	N	Y	N	N	N	Y	N	N	N	N	128	69	80	20	99		4.86	1.91	2.29	0.15	161	198	118	33	45.9	25.2	3.9	109	9.9
CCO211	Validation	positive	N	1	17	Han	Y	N	Mild	25.03	33.89		N	N	N	N		Y	38.5	Y	N	N	N	N	N	Y	N	N	N	N	120	65	82	21	98		4.45	2.16	1.62	0.2	161	140	42	29	42.8	11.9	4.6	84	11.3
CCO212	Validation	positive	N	2	17	Han	Y	N	Mild	31.66	0		N	N	N	N		Y	38.7	Y	N	N	N	N	N	N	N	N	N	N	120	60	74	18	98		4.04	1.49	2.14	0.07	132	252	11	24	43	9.2	4.2	84	10.7
CCO213	Validation	positive	N	2	17	Han	Y	N	Mild	27.74	0		N	N	N	N		Y	38.8	Y	N	N	N	N	N	Y	N	N	N	N	116	75	80	20	99		5.874	2.5	2.75	0.23	100	388	10	14	47	8.7	3.9	81	9.3
CCO214	Validation	positive	N	1	18	Han	Y	N	Mild	35.61	0		N	N	N	N		N	U	N	N	Y	N	N	N	N	N	N	N	N	112	70	70	17	97		5.56	3.32	1.87	0.32	158	175	62	25	44.7	23.3	4.4	85	11.6
CCO215	Validation	positive	N	2	18	Han	Y	N	Mild	29.75	0		N	N	N	N		N	U	Y	N	N	N	N	N	Y	N	N	N	N	116	65	74	18	98		6.21	3	2.61	0.11	126	264	22	19	40.3	8.8	4.11	66	8.4
CCO216	Validation	positive	N	2	38	Han	Y	N	Mild	24.23	29.94		N	N	N	N		Y	38.4	N	N	N	N	N	N	N	N	N	N	N	132	60	74	18	99		3.6	2.05	1.23	0.03	131	190	18	13	36.5	17	2.4	69	8.8
CCO217	Validation	positive	N	2	17	Han	Y	N	Mild	33.13	0		N	N	N	N		N	U	Y	N	N	N	N	N	N	N	N	N	N	115	60	74	18	99		6.42	3.24	2.65	0.66	117	240	17	20	41.3	14.3	4.3	69	10.2
CCO218	Validation	positive	N	2	17	Han	Y	N	Mild	32.11	0		N	N	N	N		N	U	Y	N	N	N	N	N	N	N	N	N	N	115	62	80	20	99		4.56	1.68	2.45	0.09	113	244	15	14	44	16.4	4.8	68	9.1
CCO219	Validation	positive	N	1	50	Han	Y	N	Mild	28.52	37.06		N	N	N	N		N	U	Y	N	N	N	N	N	N	N	N	N	N	116	65	56	20	97		3.94	2.03	1.52	0.05	130	290	35	20	42.2	9.3	5.8	71	10
CCO220	Validation	positive	N	2	34	Han	Y	N	Mild	28.44	0		N	N	N	N		Y	38.7	Y	N	N	N	N	N	N	N	N	N	N	120	80	70	18	98		3.5	1.06	1.98	0.12	107	253	20	16	42.7	17.3	3.2	68	9.4
CCO221	Validation	positive	N	2	61	Han	Y	N	Mild	33.05	0		N	N	N	N		N	U	N	N	N	N	N	N	N	N	N	N	N	100	62	70	18	98		7.61	3.91	2.95	0.35	131	224	24	21	43.6	16.4	6.5	98	9.9
CCO222	Validation	positive	N	1	30	Han	Y	N	Mild	21.02	0		N	N	N	N		Y	39	Y	N	N	N	N	N	Y	N	N	N	N	115	60	80	20	98		2.79	1.01	1.49	0.01	159	186	13	18	42.4	7.3	4.9	109	10.3
CCO223	Validation	positive	N	2	27	Han	Y	N	Mild	36.06	0		N	N	N	N		N	U	Y	N	N	N	N	N	N	N	N	N	N	120	70	74	18	99		6.85	4.17	2.27	0.05	122	336	7	15	43.6	6.9	3.3	76	11.5
CCO224	Validation	positive	N	1	18	Han	Y	N	Mild	31.19	0		N	N	N	N		N	U	Y	N	Y	N	N	N	Y	N	N	N	N	110	75	80	20	98		4.76	2.11	2.14	0.1	146	176	15	20	49.7	16	6.6	86	10.4
CCO225	Validation	positive	N	2	17	Han	Y	N	Mild	35.01	0		N	N	N	N		N	U	Y	N	N	N	N	N	Y	N	N	N	N	120	80	80	20	99		6.22	3.54	2.2	0.06	135	225	10	13	41.1	16.4	3.8	85	14
CCO226	Validation	positive	N	1	17	Han	Y	N	Mild	27.58	32.69		N	N	N	N		Y	38.9	Y	N	N	N	N	N	Y	N	N	N	N	120	80	80	20	98		5.33	2.72	1.8	0.27	175	112	18	17	41.5	18.5	4.4	99	11.3
CCO227	Validation	positive	N	1	17	Han	Y	N	Mild	25.41	36.36		N	N	N	N		N	U	Y	N	Y	N	N	N	Y	N	N	N	N	120	80	80	20	98		5.91	3.28	1.99	0.13	159	215	19	15	50.5	10.6	5.8	75	11.4
CCO228	Validation	positive	N	1	18	Han	Y	N	Mild	27.59	36.59		N	N	N	N		N	U	Y	N	N	N	N	N	Y	N	N	N	N	116	75	68	18	99		5.18	2.73	1.9	0.16	165	315	26	18	48.41	13.3	5.7	80	11.1
CCO229	Validation	positive	N	2	17	Han	Y	N	Mild	26.58	0		N	N	N	N		N	U	Y	N	N	N	N	N	Y	N	N	N	N	115	62	80	20	98		7.51	4.34	2.68	0.08	116	260	10	15	38.4	16	4.6	87	9.6
CCO230	Validation	positive	N	1	17	Han	Y	N	Mild	22.89	30.33		N	N	N	N		Y	38.3	Y	N	N	N	N	N	Y	N	N	N	N	115	62	80	19	98		3.85	1.81	1.58	0.13	154	136	28	23	42.4	16.8	4.8	112	12.2
CCO231	Validation	positive	N	1	17	Han	Y	N	Mild	24.18	28.45		N	N	N	N		N	U	Y	N	N	N	N	N	N	N	N	N	N	110	70	75	20	98		3.76	1.73	1.5	0.05	171	144	36	21	47.8	36.8	5.4	93	11.9
CCO232	Validation	positive	N	1	17	Han	Y	N	Mild	26.38	32.24		N	N	N	N		N	U	Y	N	Y	N	N	N	Y	N	N	N	N	120	80	80	20	98		4.38	1.87	1.59	0.4	151	215	27	16	42.4	3.5	4.5	95	12
CCO233	Validation	positive	N	1	18	Han	Y	N	Mild	22.01	28.31		N	N	N	N		Y	39.3	Y	N	N	N	N	N	N	N	N	N	N	115	62	82	20	98		4.57	1.51	2.33	0.11	150	172	64	28	40.7	10.6	4.4	78	11.7
CCO234	Validation	positive	N	1	17	Han	Y	N	Mild	28.19	0		N	N	N	N		Y	38.6	Y	N	N	N	N	N	N	N	N	N	N	110	75	70	20	99		7.17	4.05	2.42	0.1	174	255	84	31	42.1	23.6	4.8	92	11.7
CCO235	Validation	positive	N	2	19	Han	Y	N	Mild	24.74	32.89		N	N	N	N		N	U	Y	N	N	N	N	N	Y	N	N	N	N	125	76	80	20	98		3.03	1.58	1.14	0.06	122	135	16	18	42.3	8.5	3.1	60	11.2
CCO236	Validation	positive	N	1	22	Han	Y	N	Mild	30.6	0		N	N	N	N		Y	37.3	Y	N	N	N	N	N	Y	N	N	N	N	120	70	74	18	98		5.16	2.54	2.14	0.16	142	254	21	19	44.7	19	4.7	80	9.8
CCO237	Validation	positive	N	2	17	Han	Y	N	Mild	24.56	35.92		N	N	N	N		N	U	N	N	Y	N	N	N	N	N	N	N	N	114	72	74	18	100		6.55	3.76	1.45	0.25	136	180	39	27	43.4	17.8	3.5	69	8.1
CCO238	Validation	positive	N	2	44	Han	Y	N	Mild	36.88	0		N	N	N	N		N	36。7	Y	N	Y	N	N	N	N	N	N	N	N	122	63	80	20	99		3.5	2.04	1.19	0.04	113	185	46	24	38.1	5.1	3.1	72	12.3
CCO239	Validation	positive	N	2	57	Han	Y	N	Mild	25.24	27.77		N	N	N	N		N	36.5	Y	N	N	N	N	N	N	N	N	N	N	124	75	84	21	97		3.79	2.21	1.23	0.01	141	195	31	22	44	8.4	4.4	52	11.9
CCO240	Validation	positive	N	1	44	Han	N	N	Mild	32.82	0		N	N	N	N		N	37	Y	N	Y	N	N	N	N	N	N	N	N	125	65	80	20	97		7.19	4.91	1.83	0.01	145	211	12	15	42.1	21.2	4.5	72	13.9
CCO241	Validation	positive	N	1	22	Han	Y	N	Mild	27.03	29.18		N	N	N	N		N	37	N	N	N	N	N	N	N	N	N	Y	N	117	74	84	21	93		4.06	2.09	1.63	0.05	142	150	24	17	43.5	23.3	4.9	78	13.1
CCO242	Validation	positive	N	1	57	Han	N	N	Mild	28.2	33.11		N	N	N	N		N	37	Y	N	Y	N	N	N	N	N	N	N	N	116	63	84	21	96		6.76	4.66	1.45	0.01	160	161	20	19	40.8	8.2	3.1	87	11.5
CCO243	Validation	positive	N	2	33	Han	Y	N	Mild	24	31.01		N	N	N	N		N	36.8	Y	N	Y	N	N	N	N	N	N	N	N	125	63	80	20	99		2.85	1.49	0.99	0.07	114	213	45	17	40.9	3.6	1.9	77	11.8
CCO244	Validation	positive	N	2	30	Han	N	N	Mild	35.18	0		N	N	N	N		Y	39	Y	Y	Y	N	N	N	N	N	N	N	N	120	66	66	16	99		2.79	1.29	1.26	0	125	136	7	20	40.3	8.2	2.5	87	10.1
CCO245	Validation	positive	N	2	18	Han	N	N	Mild	32.22	0		N	N	N	N		N	U	Y	N	N	N	N	N	N	N	N	N	N	118	65	82	16	99		4.91	2.22	2.03	0.17	131	169	20	18	47.6	14	3.3	71	13.9
CCO246	Validation	positive	N	2	17	Han	N	N	Mild	26.43	0		N	N	N	N		N	36.6	Y	N	Y	N	N	N	N	N	N	N	N	117	75	84	21	99		3.32	1.02	2.02	0.03	127	171	9	22	46.2	7	3.5	72	13.9
CCO247	Validation	positive	N	2	18	Han	N	N	Moderate	26.21	36.27		N	N	N	N		N	36.7	Y	N	Y	N	N	N	N	N	N	N	N	120	80	80	20	100		7.91	5.22	2.28	0.07	142	204	16	9	46.3	16.6	3.8	66	12.4
CCO248	Validation	positive	N	2	17	Han	N	N	Mild	24.7	32.56		N	N	N	N		N	36.6	Y	N	Y	N	N	N	N	N	N	N	N	120	80	80	20	100		6.45	4.89	1.11	0.04	132	162	21	24	42.5	6.8	3.5	64	12.5
CCO249	Validation	positive	N	1	18	Han	N	N	Mild	29.16	36.73		N	N	N	N		N	36.5	N	N	Y	N	N	N	N	N	N	N	N	125	75	80	20	100		9.46	8	1.07	0.02	163	216	34	25	43.4	11.2	4.5	70	14.6
CCO250	Validation	positive	N	2	18	Han	N	N	Mild	35.25	0		N	N	N	N		N	37.1	Y	N	Y	N	N	N	N	N	N	N	N	120	80	80	20	99		4.94	3.2	1.51	0.02	132	233	7	14	42.9	15.4	3.9	68	11.9
CCO251	Validation	positive	N	1	18	Han	N	N	Mild	36.1	0		N	N	N	N		N	36.5	Y	N	Y	N	N	N	N	N	N	N	N	125	75	79	18	100		6.66	3.62	2.09	0.48	170	205	35	25	48.7	15.2	5.5	67	13.5
CCO252	Validation	positive	N	1	17	Han	N	N	Mild	34.45	0		N	N	N	N		N	37	Y	N	N	N	N	N	N	N	N	N	N	120	70	75	19	100		3.95	2.17	1.22	0.06	159	216	28	21	54.8	9	4	82	12.5
CCO253	Validation	positive	N	2	24	Han	N	N	Mild	21.74	24.48		N	N	N	N		N	36.4	Y	N	Y	N	N	N	N	N	N	N	N	120	80	80	20	100		3.85	2.1	1.38	0.07	133	168	12	20	45	9.6	4.4	58	12.7
CCO254	Validation	positive	N	1	17	Han	N	N	Mild	30.14	34.9		N	N	N	N		N	37	Y	N	N	N	N	N	N	N	N	N	N	125	65	80	20	99		5.54	2.7	2.26	0.12	145	210	12	19	42.2	5.6	5.3	79	13
CCO255	Validation	positive	N	1	17	Han	N	Y	Mild	28.2	34.41		N	N	N	N		N	37	Y	N	N	N	N	N	N	N	N	N	N	125	63	76	16	100		6.31	3.41	1.93	0.22	161	270	95	38	44.2	10	4.2	90	13.4
CCO256	Validation	positive	N	2	39	Han	Y	N	Mild	33.61	0		N	N	N	N		N	36.4	Y	N	N	N	N	N	N	N	N	N	N	120	66	66	16	98		4.34	2.02	1.79	0.09	120	194	13	25	40.9	10	3.2	59	11.7
CCO257	Validation	positive	N	2	41	Han	N	N	Mild	24.26	28.95		N	N	N	N		Y	38.5	N	N	N	N	N	N	N	N	N	N	N	120	80	80	20	97		4.01	2.22	1.24	0.06	95	179	13	21	41.5	9.1	2.8	60	11.6
CCO258	Validation	positive	N	2	53	Han	Y	N	Mild	30.67	32.51		N	N	N	N		N	U	N	N	N	N	N	N	N	N	N	N	N	125	81	78	19	97		2.65	0.91	1.48	0.05	98	250	22	15	34.9	14	3.1	45	9.4
CCO259	Validation	positive	N	1	51	Han	N	N	Mild	25.12	27.55		N	N	N	N		N	36.7	N	Y	Y	N	N	N	N	N	N	N	N	142	93	78	20	98		4.22	2.52	1.27	0.02	153	211	16	21	42.1	11.9	5.5	94	19
CCO260	Validation	positive	N	1	31	Han	Y	N	Mild	28.7	34		N	N	N	N		N	36.6	Y	Y	Y	N	N	N	N	N	N	N	N	120	80	80	20	97		5.92	3.65	1.25	0.01	154	139	27	20	42.6	6.1	2.9	73	13.2
CCO261	Validation	positive	N	2	21	Han	N	N	Mild	24.7	29.08		N	N	N	N		Y	36.5	N	N	Y	N	N	N	N	N	N	N	N	120	80	80	20	99		5.34	3.44	1.39	0.02	134	142	18	20	41.8	8.5	3.9	63	13.6
CCO262	Validation	positive	N	2	69	Han	Y	U	Mild	29.38	0		N	N	N	N		Y	38.5	Y	N	N	N	N	N	N	N	N	N	N	140	78	75	18	98		3.62	0.84	2.56	0.03	138	253	9	20	40.8	2.5	3.1	64	9.6
CCO263	Validation	positive	N	1	70	Han	Y	U	Mild	34.29	0		N	N	N	N		N	37	Y	N	Y	N	N	N	N	N	N	N	N	125	86	86	18	98		4.65	2.84	1.37	0.11	134	257	13	25	41	9	6.9	61	10.6
CCO264	Validation	positive	N	2	35	Han	Y	U	Mild	U	U		N	N	N	N		Y	37.5	Y	N	N	N	N	N	N	N	N	N	N	121	75	88	20	98		4.58	2.8	1.5	0.09	81	194	16	24	37.6	5.7	4	70	11.1
CCO265	Validation	positive	N	2	21	Han	Y	U	Mild	U	U		N	N	N	N		N	36.8	N	N	N	N	N	N	N	N	N	N	N	124	74	82	20	98		4.86	2.16	2.37	0.01	133	335	144	73	46.8	24.3	3	64	12.5
CCO266	Validation	positive	N	2	45	Han	Y	U	Mild	U	U		N	N	N	N		N	36.5	Y	N	N	N	N	N	N	N	N	N	N	149	90	80	20	98		3.2	1.61	1.26	0.03	130	182	24	18	43.8	7.2	4.5	74	12.5
CCO267	Validation	positive	N	2	28	Han	Y	U	Mild	U	U		N	N	N	N		N	36.5	Y	N	Y	N	N	N	N	N	N	N	N	116	75	80	20	98		3.59	1.92	1.27	0.06	122	216	16	14	37.4	7.2	3.2	56	11.3
CCO268	Validation	positive	N	2	17	Han	Y	U	Mild	U	U		N	N	N	N		N	37	Y	Y	Y	N	N	N	Y	N	N	N	N	132	69	80	19	97		6.2	2.94	2.79	0.12	120	234	54	30	40.2	5.1	4.3	58	11.9
CCO269	Validation	positive	N	1	17	Han	Y	U	Mild	U	U		N	N	N	N		Y	37.3	N	N	Y	N	N	N	N	N	N	N	N	105	68	72	17	96		7.52	3.38	3.5	0.15	155	237	16	21	44.1	13.1	4.7	69	14.4
CCO270	Validation	positive	N	1	18	Han	Y	U	Mild	U	U		N	N	N	N		Y	37.3	Y	N	Y	N	N	N	Y	N	N	N	N	116	68	72	18	96		10.21	5.11	4.36	0.08	166	299	29	22	44.2	16.2	5.2	93	12
CCO271	Validation	positive	N	1	18	Han	Y	U	Mild	32.85	0		N	N	N	N		N	36.9	Y	N	N	N	N	N	Y	N	N	N	N	114	69	75	20	98		5.11	2.04	2.65	0.05	158	197	14	18	45.5	10.8	5.5	88	12
CCO272	Validation	positive	N	2	44	Han	Y	U	Mild	28.44	33.15		N	N	N	N		Y	38.6	Y	N	N	N	N	N	Y	N	N	N	N	114	66	75	18	96		4.7	2.4	1.59	0.01	116	202	14	14	40	7.1	4.9	67	12.5
CCO273	Validation	positive	N	1	55	Han	Y	U	Mild	U	U		N	N	N	N		N	36.4	N	N	N	N	N	N	N	N	N	N	N	136	85	62	16	95		3.28	1.23	1.72	0.06	144	203	26	48	41.5	11.3	3.6	70	10.9
CCO274	Validation	positive	N	2	22	Han	Y	U	Mild	U	U		N	N	N	N		N	36.9	N	N	N	N	N	N	N	N	N	N	N	132	72	76	18	96		6.25	3.51	2.41	0.04	126	189	12	18	50	14.8	4.7	78	12.3
CCO275	Validation	positive	N	1	17	Han	Y	U	Mild	U	U		N	N	N	N		N	37	Y	N	N	N	N	N	N	N	N	N	N	112	65	78	18	98		5.94	2.97	2.24	0.24	172	164	17	21	44	11	5.9	80	13.7
CCO276	Validation	positive	N	1	18	Han	Y	U	Mild	U	U		N	N	N	N		N	36.9	N	N	N	N	N	N	N	N	N	N	N	122	69	78	19	97		4.82	1.8	2.26	0.31	163	166	26	20	47.7	12.5	4.3	68	13.4
CCO277	Validation	positive	N	1	17	Han	Y	U	Mild	U	U		N	N	N	N		N	37	N	N	N	N	N	N	N	N	N	N	N	110	70	74	20	100		3.97	1.05	2.28	0.28	140	135	10	12	47	9.3	3.9	71	14.1
CCO278	Validation	positive	N	2	67	Han	Y	U	Mild	U	U		N	N	N	N		N	37.1	N	N	N	N	N	N	N	N	N	N	N	192	115	78	20	99		5.42	3.55	1.66	0.01	128	243	14	17	40.2	13.2	2.8	56	12.1
CCO279	Validation	positive	N	2	54	Han	Y	U	Mild	U	U		N	N	N	N		N	37.1	N	N	N	N	N	N	N	N	N	N	N	198	101	80	20	98		8.95	4.88	3.56	0.07	145	203	27	18	42.4	16.1	4.2	54	10.7
CCO280	Validation	positive	N	1	17	Han	Y	U	Mild	U	U		N	N	N	N		N	36.8	N	N	N	N	N	N	N	N	N	N	N	146	109	76	19	100		7.44	4.44	2.45	0.1	164	217	26	22	49.1	23.1	5.5	81	12.9
CCO281	Validation	positive	N	1	49	Han	Y	U	Mild	U	U		N	N	N	N		Y	38.9	Y	N	N	N	N	N	Y	N	N	N	N	125	91	78	18	99		5.65	3.08	2.13	0.02	164	169	20	15	40.1	18.2	3.2	81	11.7
CCO282	Validation	positive	N	1	50	Han	Y	U	Mild	U	U		N	N	N	N		N	36.8	Y	N	N	N	N	N	Y	N	N	N	N	126	80	74	18	99		6.5	3.68	1.98	0.16	156	170	20	22	36.8	12.1	6.2	40	11.7
CCO283	Validation	positive	N	2	45	Han	Y	U	Mild	U	U		N	N	N	N		N	36.8	N	N	N	N	N	N	N	N	N	N	N	125	77	84	20	98		3.13	1.82	1.05	0.01	128	178	16	15	39.9	15.4	4.8	67	11.5
CCO284	Validation	positive	N	2	69	Han	Y	U	Mild	U	U		N	N	N	N		Y	37.8	Y	N	N	N	N	N	Y	N	N	N	N	130	80	90	20	99		7.49	4.1	2.71	0.21	135	181	33	26	42.4	18.1	6.7	74	12
CCO285	Validation	positive	N	2	18	Han	Y	U	Mild	U	U		N	N	N	N		Y	38	Y	N	N	N	N	N	Y	N	N	N	N	105	84	68	17	97		3.63	1.48	1.69	0.09	138	276	11	16	41.4	11.3	3.8	71	11.5
CCO286	Validation	positive	N	1	66	Han	Y	U	Mild	U	U		N	N	N	N		N	36.8	N	N	N	N	N	N	N	N	N	N	N	145	84	74	18	100		4.25	2.28	1.76	0.02	134	200	19	38	37.1	13.8	6.7	68	11.9
CCO287	Validation	positive	N	2	30	Han	Y	U	Mild	U	U		N	N	N	N		N	37.1	N	Y	N	N	N	N	N	N	N	N	N	116	68	72	18	96		4.06	1.97	1.81	0.01	145	171	11	20	40.9	6.5	2.9	61	12.1
CCO288	Validation	positive	N	1	25	Han	Y	U	Mild	U	U		N	N	N	N		N	37	N	Y	N	N	N	N	N	N	N	N	N	105	70	107	26	97		3.65	1.81	1.54	0.05	169	150	9	15	43.7	10.7	3.9	103	12.7
CCO289	Validation	positive	N	2	41	Han	N	N	Mild	21.05	27.15		N	N	N	N		Y	37.6	Y	N	N	N	N	N	Y	N	N	N	N	96	69	80	20	96		3.16	1.52	1.26	0.02	138	151	94	61	44.6	9.3	2.9	68	10.7
CCO290	Validation	positive	N	1	51	Han	N	Y	Mild	21.36	28.34		N	N	N	N		N	36.9	N	N	Y	N	N	N	N	N	N	N	N	127	69	76	18	97		5.92	2.68	2.61	0.08	170	150	112	212	42.2	17.3	7.3	72	9.1
CCO291	Validation	positive	N	2	31	Han	Y	N	Mild	17.29	23		N	N	N	N		Y	37.8	Y	N	N	N	N	N	N	N	N	N	N	118	68	80	20	98		2.29	0.99	0.86	0.04	136	131	12	15	45.2	13	4.7	60	9.6
CCO292	Validation	positive	N	1	18	Han	N	N	Mild	25.83	32.48		N	N	N	N		N	36.8	N	N	N	N	N	N	N	N	N	N	N	133	74	75	18	98		8.49	5	2.77	0.11	177	274	64	27	29.7	12.2	5.4	109	11.1
CCO293	Validation	positive	N	2	49	Han	N	N	Mild	17.77	23.64		N	N	N	N		Y	38.5	Y	N	N	N	N	N	Y	N	N	N	N	148	89	82	21	98		3.72	1.93	1.44	0.01	148	211	16	21	33.5	18.6	3.3	76	10.9
CCO294	Validation	positive	N	2	32	Han	Y	N	Mild	25.36	29.66		N	N	N	N		Y	38	Y	N	N	N	N	Y	Y	N	N	N	N	106	75	84	21	99		2.76	1.16	1.02	0.02	98	291	7	21	43.4	8.5	2.9	68	9.3
CCO295	Validation	positive	N	1	33	Han	Y	N	Mild	19.28	25.04		N	N	N	N		N	36.8	Y	N	N	N	N	N	Y	N	N	N	N	105	75	76	19	95		3.57	1.86	1.37	0.08	156	146	9	15	42.4	18.8	5.1	89	9.8
CCO296	Validation	positive	N	2	51	Han	N	N	Mild	34.15	0		N	N	N	N		Y	37.2	Y	N	N	N	N	Y	Y	N	Y	N	N	140	90	90	20	98		9.99	7.87	1.66	0.01	120	243	16	7	43	16.5	3.1	61	9.9
CCO297	Validation	positive	N	2	50	Han	N	N	Mild	24.37	29.74		N	N	N	N		N	36.5	N	N	N	N	N	N	N	N	N	N	N	120	70	86	20	96		4.91	1.89	2.57	0.03	158	186	40	34	46	15.7	5.9	81	11.2
[truncated: 10 more columns]
