# Supplementary material for: Dynamic changes of Bacterial Microbiomes in Oropharynx during Infection and Recovery of COVID-19 Omicron Variant
Source: PLoS Pathog. 2024 Apr 3;20(4):e1012075. doi: 10.1371/journal.ppat.1012075 (PMC10990182; doi:10.1371/journal.ppat.1012075)
Supplement: S17 Table — (XLSX) [file ppat.1012075.s024.xlsx]

## Sheet: Sheet1
S17 Table. The different degree of genus level (p value) in CCO2 and CCO3 groups (CCO2=60, CCO3=20)
ID	CCO2.median	CCO2.mean	CCO2.se	CCO3.median	CCO3.mean	CCO3.se	p-value	z-score	Sig_mark	q-value	fixp	fixps
Granulicatella	0.0032(0.0032,0.0032)	0.0106937	0.00197369	0.0021(0.0021,0.0021)	0.0049115	0.00100809	0.0184955	-2.35555	*	0.603739	0.0185	* 0.0185
Lactobacillales_P5D1-392	0.0014(0.0014,0.0014)	0.00285877	0.000322953	0.0009(0.0009,0.0009)	0.0017849	0.000336269	0.0243342	-2.25181	*	0.603739	0.0243	* 0.0243
Corynebacterium	<0.0001(<0.0001,<0.0001)	0.00106285	0.000456989	<0.0001(<0.0001,<0.0001)	0.00025745	0.00020007	0.00112384	-3.25754	**	0.124746	0.0011	** 0.0011
